# Supplementary material for: Time-lapse imaging of cell death in cell culture and whole living organisms using turn-on deep-red fluorescent probes
Source: Royal Society of Chemistry journal article supplement (doi:10.1039/c8tb01495g), 2018-01-01
Supplement: c8tb01495g1.pdf [file c8tb01495g1.pdf]

*Electronic Supplementary Information (ESI) for:*

**Time-Lapse Imaging of Cell Death in Cell Culture and Whole Living Organisms  
Using Turn-On Deep-Red Fluorescent Probes**

Tia S. Jarvis, Felicia M. Roland, Kyle M. Dubiak, Paul W. Huber, Bradley D. Smith\*

Department of Chemistry and Biochemistry, 236 Nieuwland Science Hall, University of  
Notre Dame, Notre Dame, IN 46556, USA.

\*Email: smith.115@nd.edu

**A. Synthesis and Characterization**

**B. Photophysical Studies**

**C. In Vitro Studies**

**D. Xenopus Studies**

## A. Synthesis and Characterization

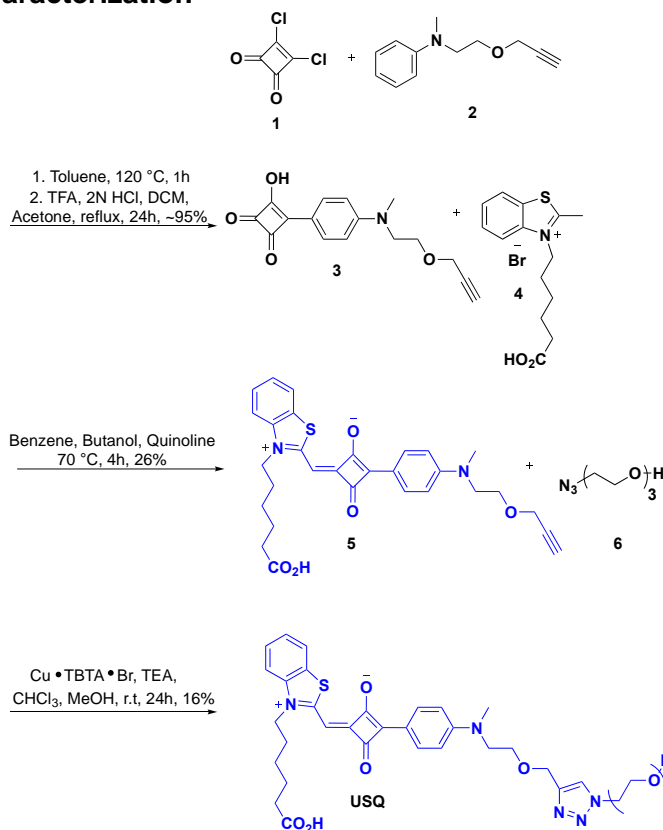

**Semisquaraine 3.** The known compounds **1** (615 mg, 4.1 mmol) and **2** (1.02 g, 4.5 mmol)<sup>S1</sup> were dissolved in 20 mL of toluene and heated to reflux for one hour. The solvent was removed under pressure, and the residue was redissolved in 2.0 mL 2N HCl, 3.0 mL dichloromethane, 8.0 mL acetone, and 2.0 mL trifluoroacetic acid (TFA) then refluxed for 24 hours. The hot solution was poured over ice, upon cooling to room temperature, the precipitate was vacuum filtered to yield **3** as a golden yellow solid (708 mg, 2.34 mmol, 60%). <sup>1</sup>H NMR (500 MHz, DMSO-d<sub>6</sub>) δ 7.84 (d, *J* = 10 Hz, 2H), 6.86 (d, *J* = 10 Hz, 2H), 4.15 (d, *J* = 3 Hz, 2H), 3.63 (s, 4H), 3.42 (t, *J* = 3 Hz, 1H), 3.01 (s, 3H), <sup>13</sup>C NMR (400 MHz, DMSO-d<sub>6</sub>) δ 195.1, 174.1, 128.3, 112.3, 80.7, 77.7, 67.1, 58.15, 51.4

**Benzothiazole 4.** 2-Methylbenzothiazole (803 μL, 6.4 mmol) and 6-bromohexanoic acid were placed in a sealed pressure-tube and heated to reflux for 24 hours. The pink residue was

dissolved with a minimal amount of methanol then precipitated with excess ether. The precipitate was vacuum filtered then washed with ether to yield **4** as a light pink solid (1.63 g, 4.74 mmol, 74%). <sup>1</sup>H NMR (500 MHz, CD<sub>3</sub>OD) δ 8.31 (d, *J* = 8 Hz, 1H), 8.27 (d, *J* = 8 Hz, 1H), 7.92 (t, *J* = 8 Hz, 1H), 7.82 (t, *J* = 8 Hz, 1H), 4.77 (t, *J* = 8 Hz, 2H), 3.24 (s, *J* = Hz, 3H), 2.34 (t, *J* = 7 Hz, 2H), 2.00 (m, 2H), 1.71 (m, 2H), 1.57 (m, 2H); <sup>13</sup>C NMR NMR (400 MHz, CD<sub>3</sub>OD) δ 176.7, 174.2, 141.2, 129.6, 129.3, 128.4, 124.0, 116.5, 49.3 33.0, 27.7, 25.6, 24.0, 15.7; HRMS (ESI-TOF) found *m/z* 264.1071, calculated C<sub>14</sub>H<sub>18</sub>NO<sub>2</sub>S [M+H]<sup>+</sup> 264.1053.

**Squaraine 5.** Compound **3** (237 mg, 0.689 mmol) and compound **4** (197 mg, 0.689 mmol) were dissolved in 50 mL benzene, 50 mL butanol, and 1.0 mL quinolone and heated at 75 °C for 4 hours. The solvent was removed and excess hexane was added. The precipitate was allowed to settle, and the filtrate was decanted. The solid was washed with hexane until the filtrate was colorless. The solid was dissolved in chloroform and purified via column chromatography (0 – 35% methanol in chloroform) to yield **5** as dark blue solid (93.8 mg, 0.177 mmol, 26%). mp 106 – 110 °C; <sup>1</sup>H NMR (500 MHz, DMSO-*d*<sub>6</sub>) δ 12.03 (s, 1H), 8.17 (d, *J* = 8 Hz, 1H), 7.92 (d, *J* = 8 Hz, 1H), 7.88 (d, *J* = 9 Hz, 2H), 7.63 (t, *J* = 8 Hz, 1H), 7.50 (t, *J* = 8 Hz, 1H), 6.78 (d, *J* = 9 Hz, 2H), 6.32 (s, 1H), 4.56 (t, *J* = 7 Hz, 2H), 4.14 (s, 2H), 3.62 (s, 4H), 3.42 (s, 1H), 3.00 (s, 3H), 2.20 (t, *J* = 7 Hz, 2H), 1.76 (m, 2H), 1.54 (m, 2H), 1.42 (m, 2H); <sup>13</sup>C NMR (400 MHz, DMSO-*d*<sub>6</sub>) δ 186.7, 181.9, 180.7, 174.8, 166.1, 164.5, 150.5, 140.9, 129.4, 128.8, 128.3, 126.7, 124.0, 120.2, 115.4, 112.3, 90.7, 80.8, 77.7, 67.3, 58.2, 51.4, 47.5, 34.0, 28.1, 26.0, 24.6. HRMS (ESI-TOF) found *m/z* 531.1932, calculated C<sub>30</sub>H<sub>30</sub>N<sub>2</sub>O<sub>5</sub>S [M+H]<sup>+</sup> 531.1948.

**USQ.** Compound **5** (48.2 mg, 0.091 mmol), **6** (43.3 mg, 0.247 mmol), and tris[(1-benzyl-1H-1,2,3-triazol-4-yl)methyl]amine copper(I)bromide (12.3 mg, 0.0123 mmol) were dissolved in 4 mL chloroform and 1.0 mL methanol, along with triethylamine (41 μL, 0.273 mmol), and shaken at room temperature for 24 hours. The solvent was evaporated under reduced pressure. The

residue was dissolved in water and purified via reverse phase column chromatography (0 – 50% acetonitrile in water) to yield **USQ** as a purple film (10.2 mg, 14.5  $\mu$ mol, 16%). mp > 260 °C  $^1\text{H}$  NMR (500 MHz, DMSO- $d_6$ )  $\delta$  8.15 (d,  $J$  = 8.0 Hz, 1H), 8.00 (s, 1H), 7.92 (d,  $J$  = 8.0 Hz, 1H), 7.87 (d,  $J$  = 9 Hz, 2H), 7.64 (t,  $J$  = 8 Hz, 1H), 7.50 (t,  $J$  = 8 Hz, 1H), 6.76 (d,  $J$  = 9 Hz, 2H), 6.32 (s, 1H), 4.56 (t,  $J$  = 7 Hz, 2H), 4.52 (s, 2H), 4.49 (t,  $J$  = 5 Hz, 2H), 3.77 (t,  $J$  = 5 Hz, 2H), 3.60 – 3.35 (m, 12H), 3.00 (s, 3H), 2.19 (t,  $J$  = 7 Hz, 2H), 1.76 (m, 2H), 1.54 (m, 2H), 1.42 (m, 2H).  $^{13}\text{C}$  NMR (400 MHz, DMSO- $d_6$ )  $\delta$  186.7, 181.9, 180.7, 174.8, 166.1, 164.5, 150.5, 140.9, 129.4, 128.8, 128.3, 126.74, 124.7, 124.0, 120.2, 115.4, 112.3, 90.7, 72.8, 70.1, 70.0, 69.1, 67.4, 64.1, 60.7, 51.5, 49.8, 47.4, 46.1, 34.0, 28.1, 26.0, 24.6, 11.4. HRMS (ESI-TOF) found  $m/z$  706.2921, calculated  $\text{C}_{36}\text{H}_{43}\text{N}_5\text{O}_8\text{S}$   $[\text{M}+\text{H}]^+$  706.2905.

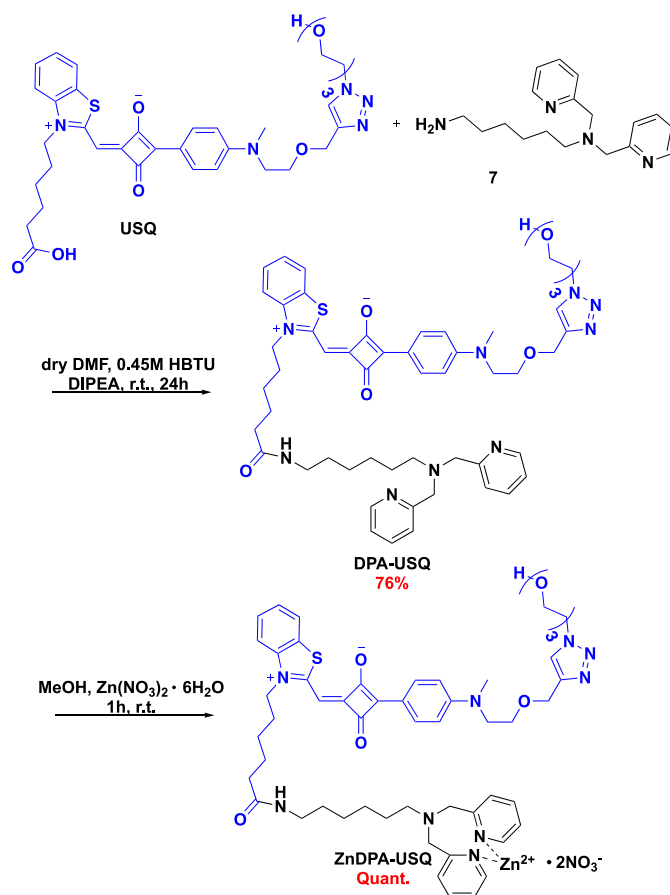

**DPA-USQ.** Compounds **USQ** (54.1 mg, 76.6  $\mu$ mol) and **7** (58.3 mg, 0.194 mmol) were dissolved in 900  $\mu\text{L}$  of dimethylformamide then chilled to 0 °C. 1.5 molar equivalence of 0.45 M HBTU

solution in dimethylformamide was added to the reaction mixture followed by N,N-diisopropylethylamine (67  $\mu$ L, 0.383 mmol), all under argon gas. The reaction mixture was allowed to reach room temperature gradually overnight. The solvent was removed under reduced pressure, and the crude product was purified via reverse column chromatography (0 – 100% acetonitrile in water with 0.1% TFA). 1M HCl (22  $\mu$ L) was added to the collected fractions to convert the TFA salt. The solvent was reduced to ~1 mL then diluted with 50% acetonitrile in water and was repeated twice. After the final reduction, the 1 mL was transferred to a tarred vial and lyophilized to yield **DPA-USQ** (70.3 mg, 71.3  $\mu$ mol, 93%) as a purple film.  $^1\text{H}$  NMR (500 MHz, 1:1 –  $\text{CD}_3\text{CN}:\text{D}_2\text{O}$ )  $\delta$  9.08 (s, 2H), 8.56 (m, 2H), 8.36 (bs, 2H), 8.10 (m, 8H), 8.00 (bs 1H), 7.92 (bs, 1H), 7.15 (bs, 2H), 6.80 (s, 1H), 5.05 (s, 2H), 4.99 (bs, 2H), 4.82 (m, 6H), 4.31 (bs, 2H), 4.07 – 3.94 (m, 12H), 3.49 (bs, 3H), 3.41 (bs, 4H), 2.63 (bs, 2H), 2.29 (bs, 2H), 2.06 (m, 4H), 1.87 (bs, 2H), 1.79 (bs, 2H), 1.64 (bs, 4H);  $^{13}\text{C}$  NMR (400 MHz,  $\text{DMSO-d}_6$ )  $\delta$  186.6, 181.9, 180.7, 174.5, 166.1, 164.5, 150.5, 144.3, 140.9, 129.4, 128.8, 128.3, 126.7, 124.7, 124.0, 120.1, 115.4, 112.3, 112.1, 90.7, 72.8, 70.1, 70.0, 69.2, 67.4, 66.0, 64.1, 60.7, 51.5, 49.8, 47.4, 46.2, 33.9, 28.1, 26.0, 24.6 HRMS (ESI-TOF) found 986.4959, calculated  $m/z$   $\text{C}_{54}\text{H}_{68}\text{N}_9\text{O}_7\text{S}$   $[\text{M}+\text{H}]^+$  986.4959.

**ZnDPA-USQ.** Compound **DPA-USQ** (0.51 mg, 0.52  $\mu$ mol) was dissolved in 256  $\mu$ L of methanol to make a 2.0 mM solution. Two molar equivalents of a 200 mM zinc nitrate solution was added and the solution shaken at room temperature for 1 hour. The solvent was removed to yield **ZnDPA-USQ** (0.618 mg, 0.52  $\mu$ mol, 100%).

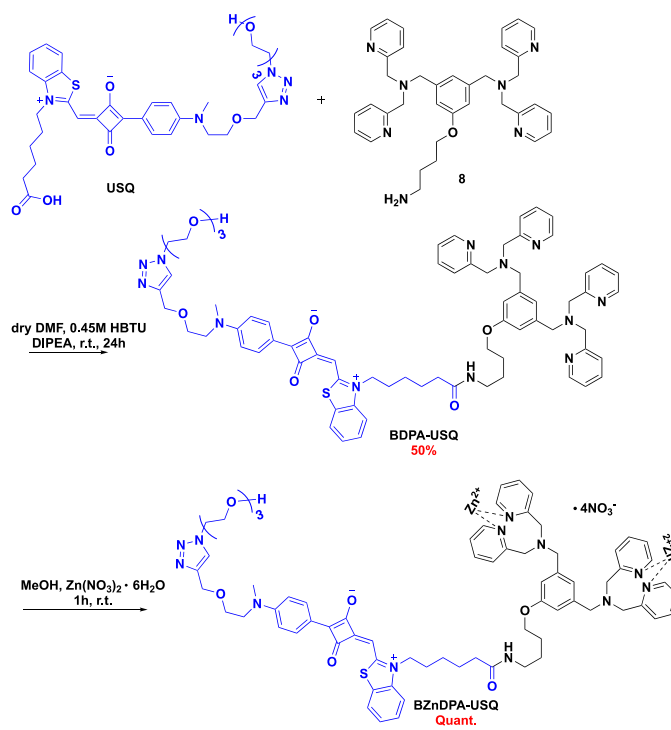

**BDPA-USQ.** Using the same procedure for **DPA-SQ**, the dye **USQ** was coupled with the known compound **8**.<sup>S2</sup> <sup>1</sup>H NMR (500 MHz, 1:1 – CD<sub>3</sub>CN:D<sub>2</sub>O) δ 8.59 (s, 4H), 8.20 (t, *J* = 8 Hz, 4H), 7.97 (d, *J* = 8 Hz, 1H), 7.86 (s, 1H), 7.81 (d, *J* = 8 Hz, 1H), 7.71 (m, 11H), 7.56 (t, 1H), 6.83 (d, *J* = 8 Hz, 2H), 6.75 (s, 1H), 6.67 (bs, 1H), 6.62 (s, 2H), 6.43 (s, 1H), 4.59 (s, 2H), 4.49 (m, 4H), 4.23 (m, 10H), 4.17 (s, 4H), 3.84 (m, 2H), 3.72 (s, 3H), 3.80 – 3.46 (m, 12H), 3.17 (t, *J* = 7 Hz, 2H), 2.20 (t, *J* = 7 Hz, 2H), 1.89 (m, 2H), 1.66 (m, 4H), 1.56 (m, 2H), 1.46 (m, 2H); <sup>13</sup>C NMR (400 MHz, 1:1 – CH<sub>3</sub>CN:D<sub>2</sub>O) δ 185.2, 183.0, 175.7, 175.7, 162.0, 161.7, 159.1, 153.4, 152.7, 146.8, 145.7, 143.6, 142.2, 138.0, 129.6, 128.1, 127.3, 127.0, 126.4, 125.6, 124.3, 124.0, 119.3, 115.9, 72.3, 70.3, 70.0, 69.2, 68.2, 63.6, 60.9, 59.8, 56.8, 56.2, 54.8, 50.5, 39.2, 38.9, 36.0, 28.3, 26.6, 26.4, 26.1, 25.9, 25.6, 25.5, 25.9, 25.6, 25.5, 22.9. HRMS (ESI-TOF) found *m/z* 1275.6205, calculated C<sub>72</sub>H<sub>82</sub>N<sub>12</sub>O<sub>8</sub>S [M+H]<sup>+</sup> 1275.6172.

**BZnDPA-USQ.** The zinc chelation procedure was the same used to make **ZnDPA-USQ**.

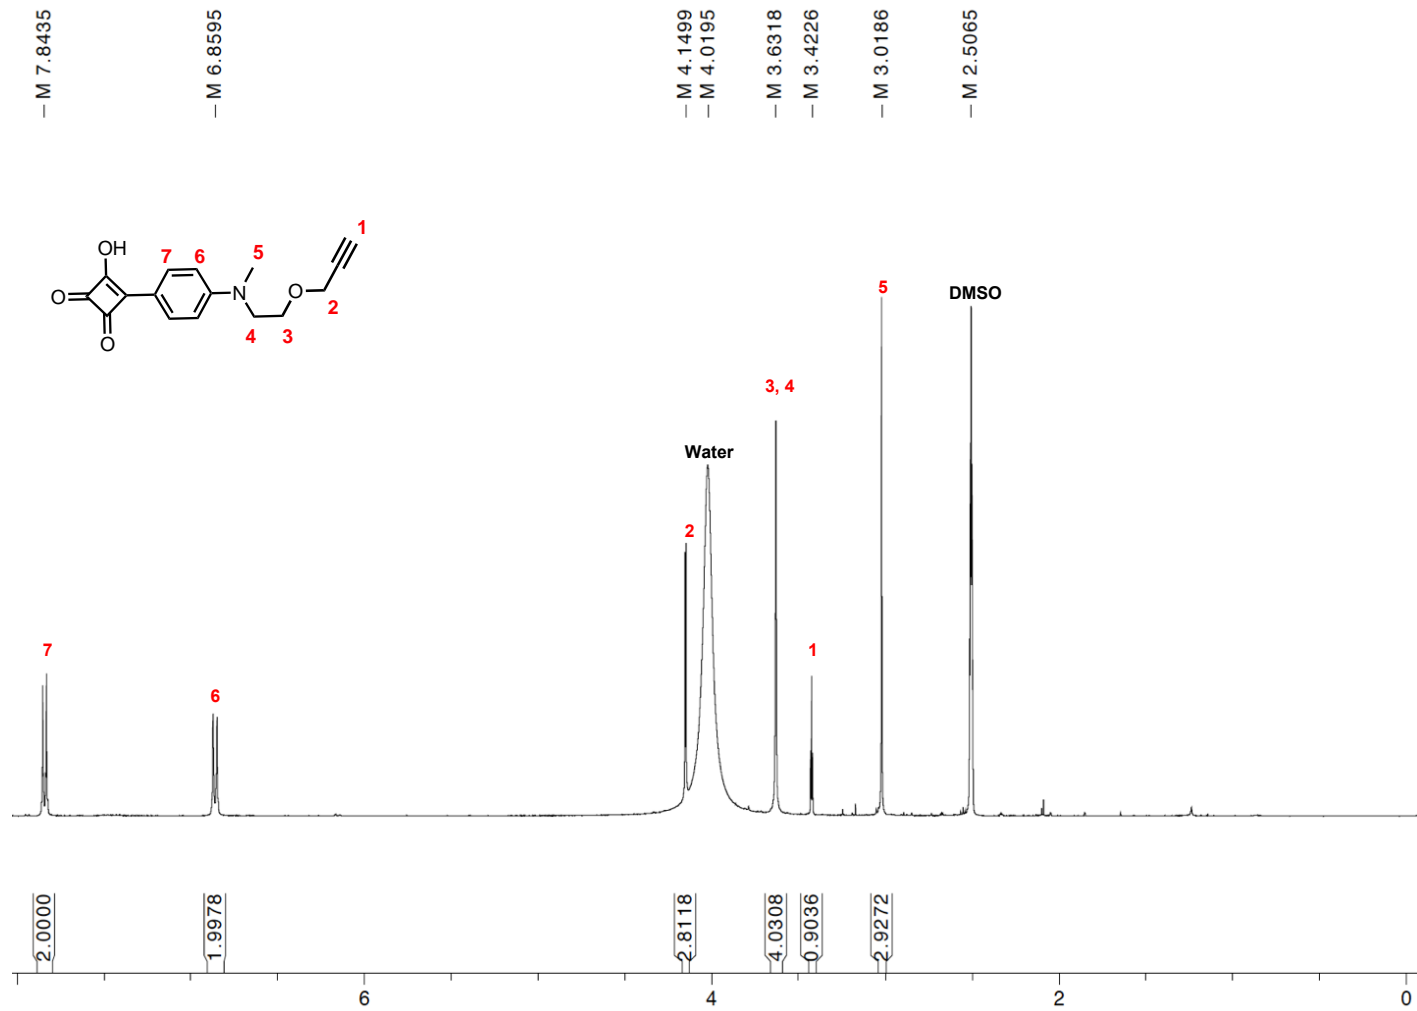

<sup>1</sup>H NMR spectrum (500 MHz, DMSO-d<sub>6</sub>) of **3**.

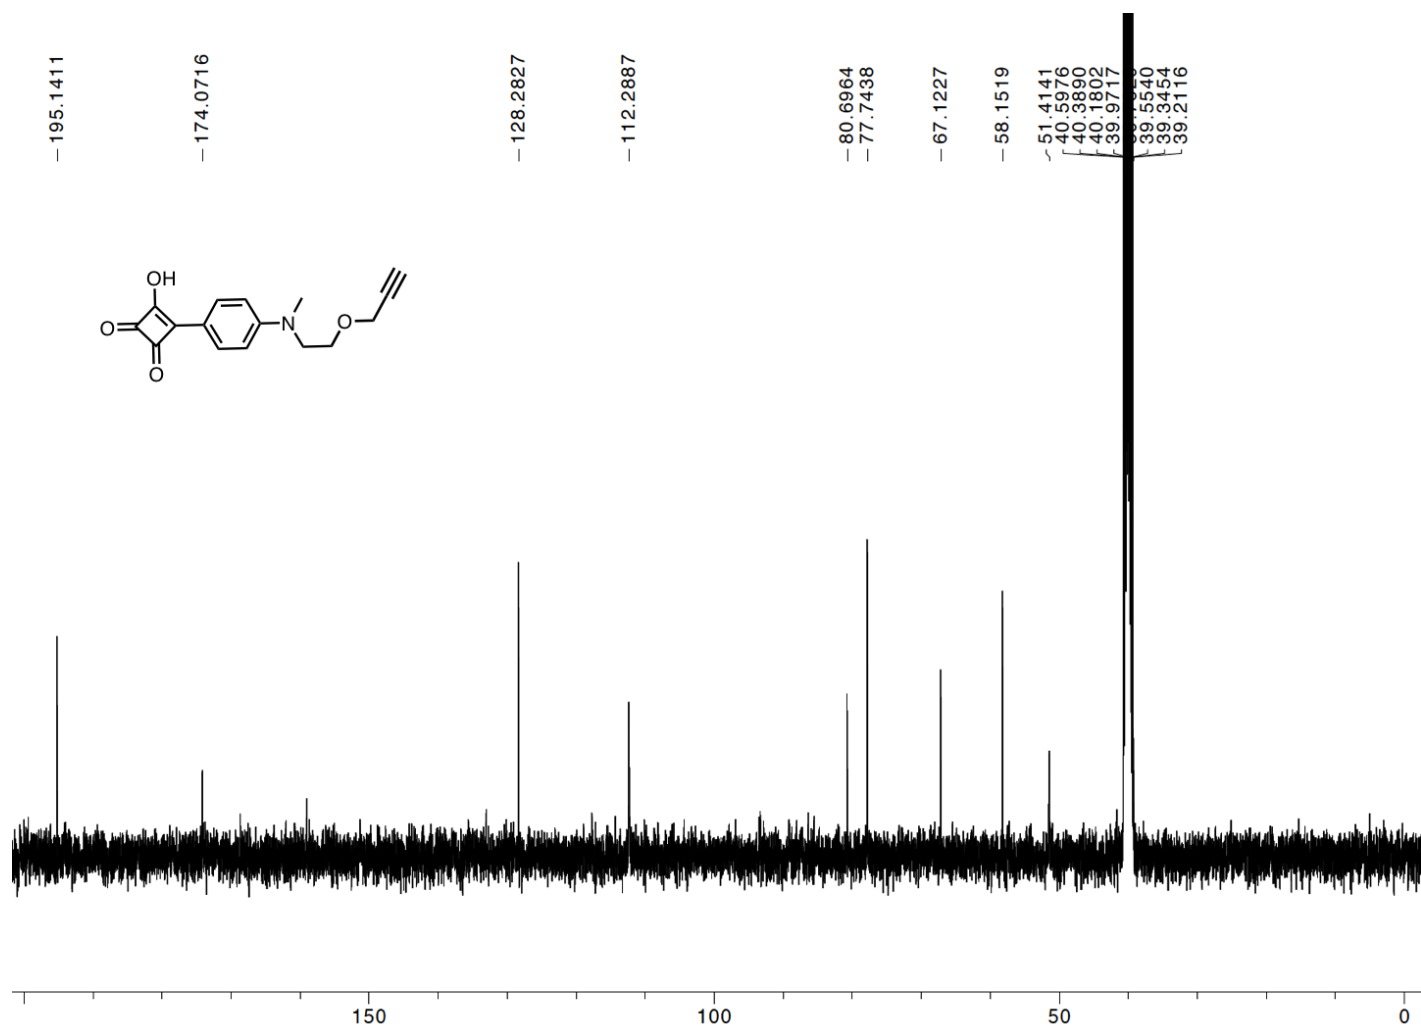

<sup>13</sup>C NMR spectrum (400 MHz, DMSO-d<sub>6</sub>) of 3.

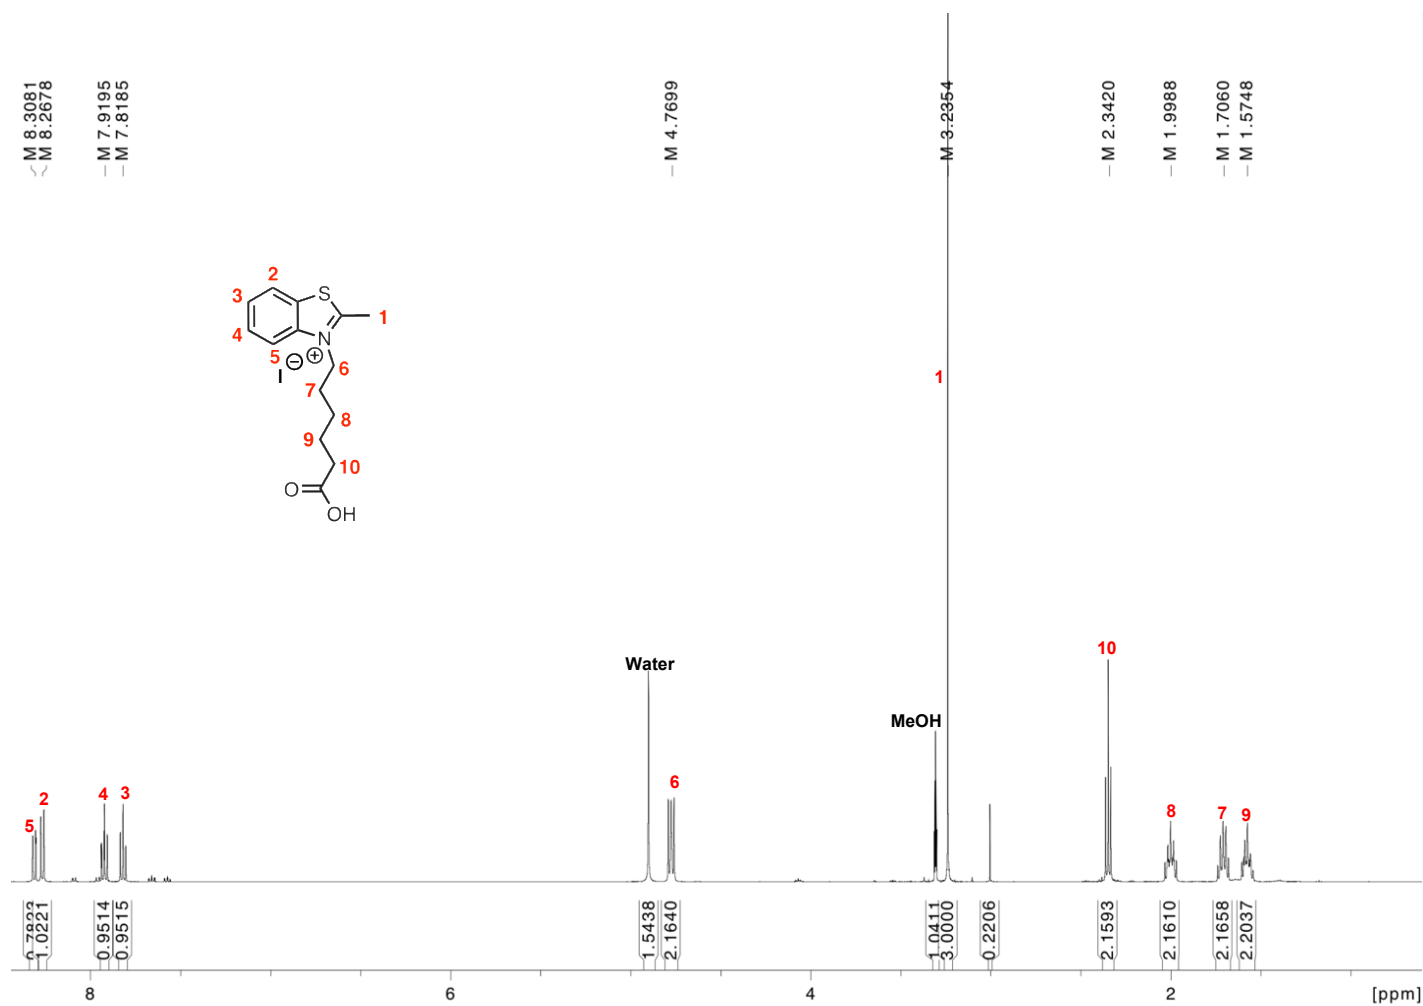

<sup>1</sup>H NMR spectrum (500 MHz, CD<sub>3</sub>OD) of **4**.

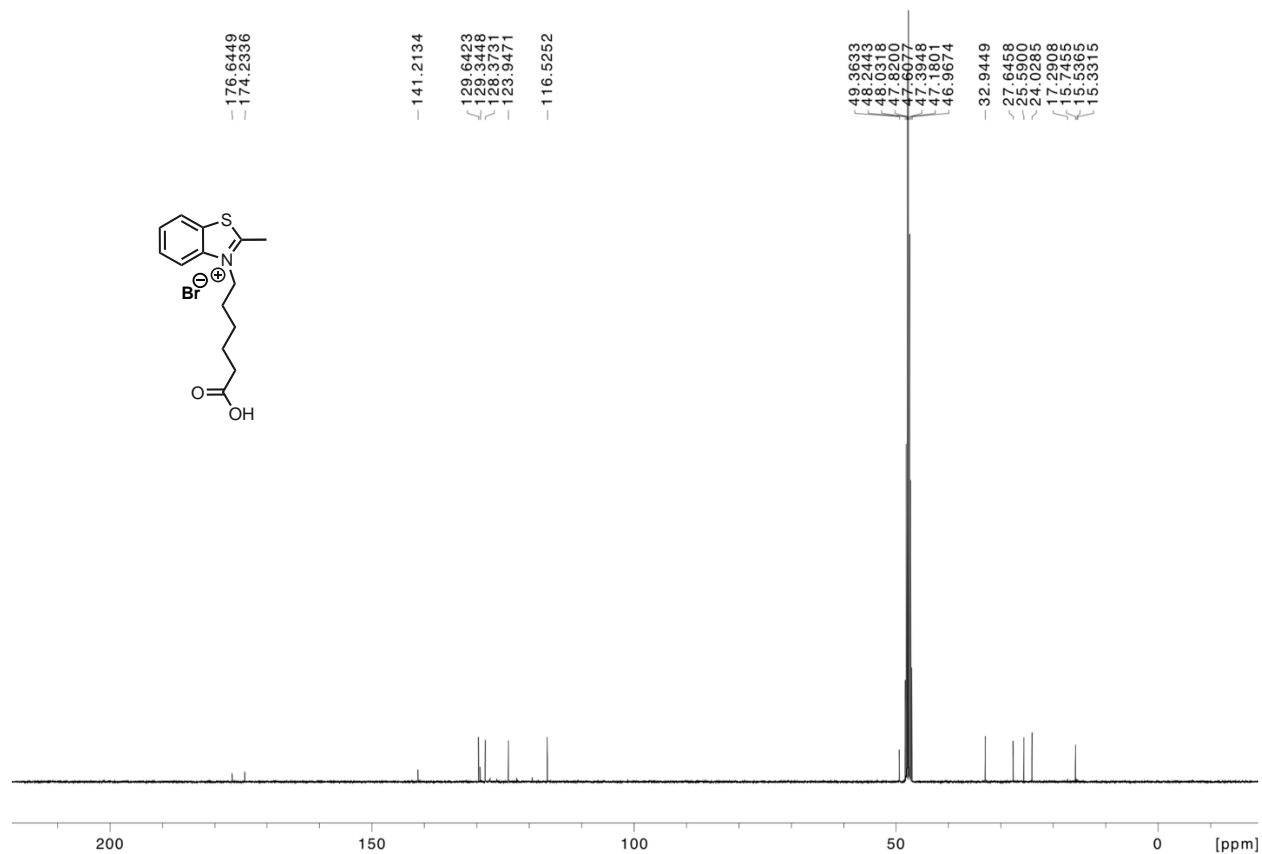

<sup>13</sup>C NMR spectrum (400 MHz, CD<sub>3</sub>OD) of 4.

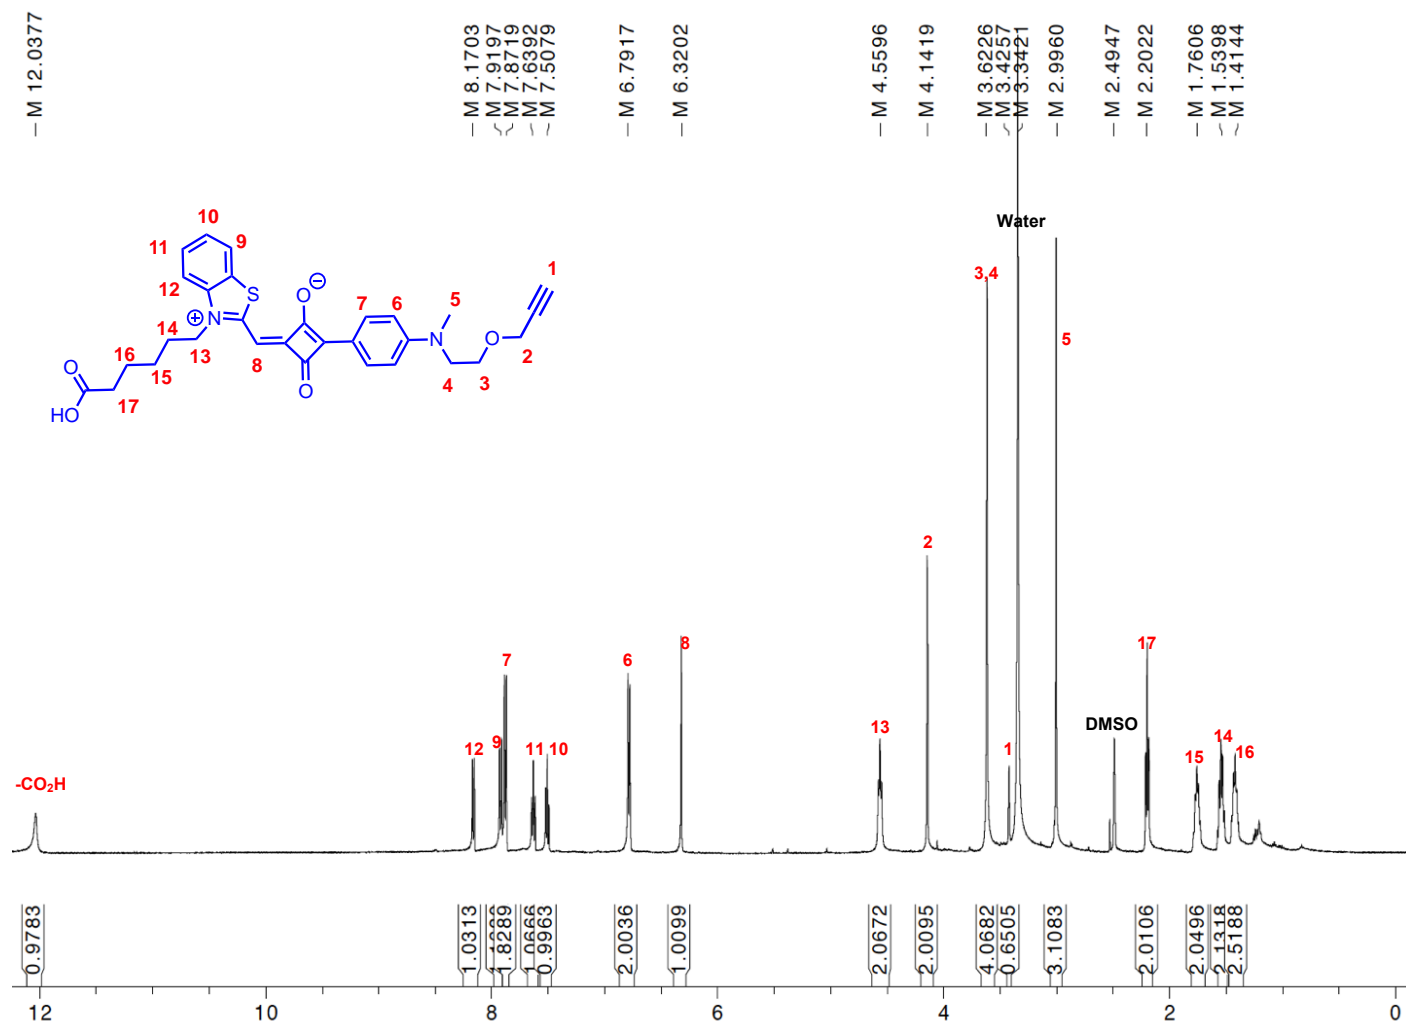

<sup>1</sup>H NMR spectrum (400 MHz, DMSO-d<sub>6</sub>) of **5**.

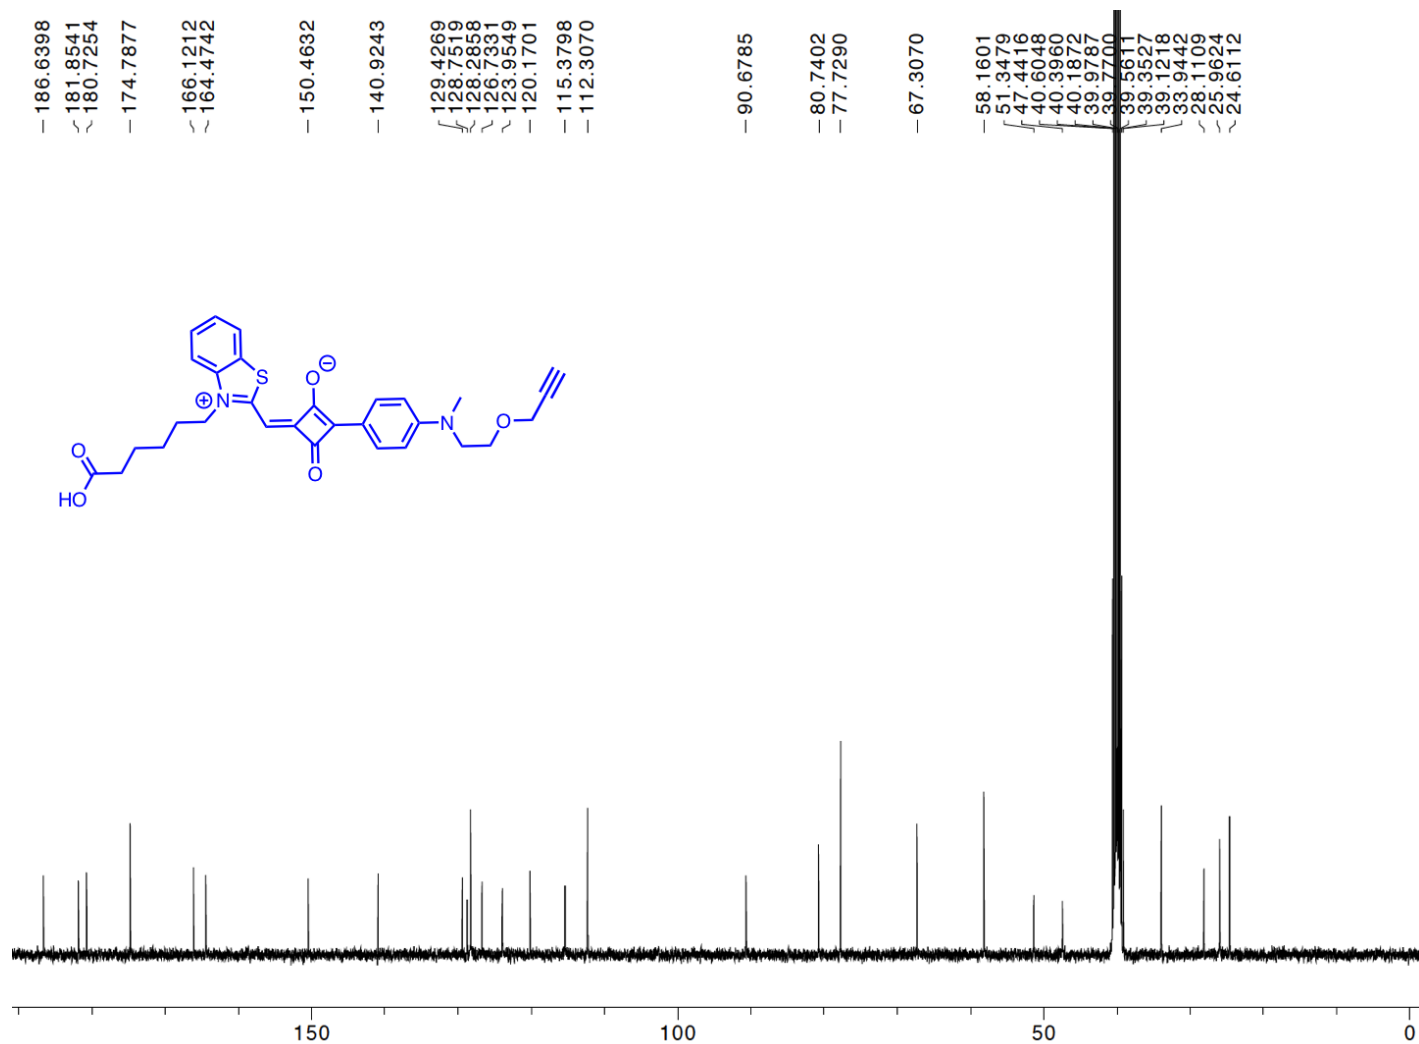

<sup>13</sup>C NMR spectrum (400 MHz, DMSO-d<sub>6</sub>) of 5.

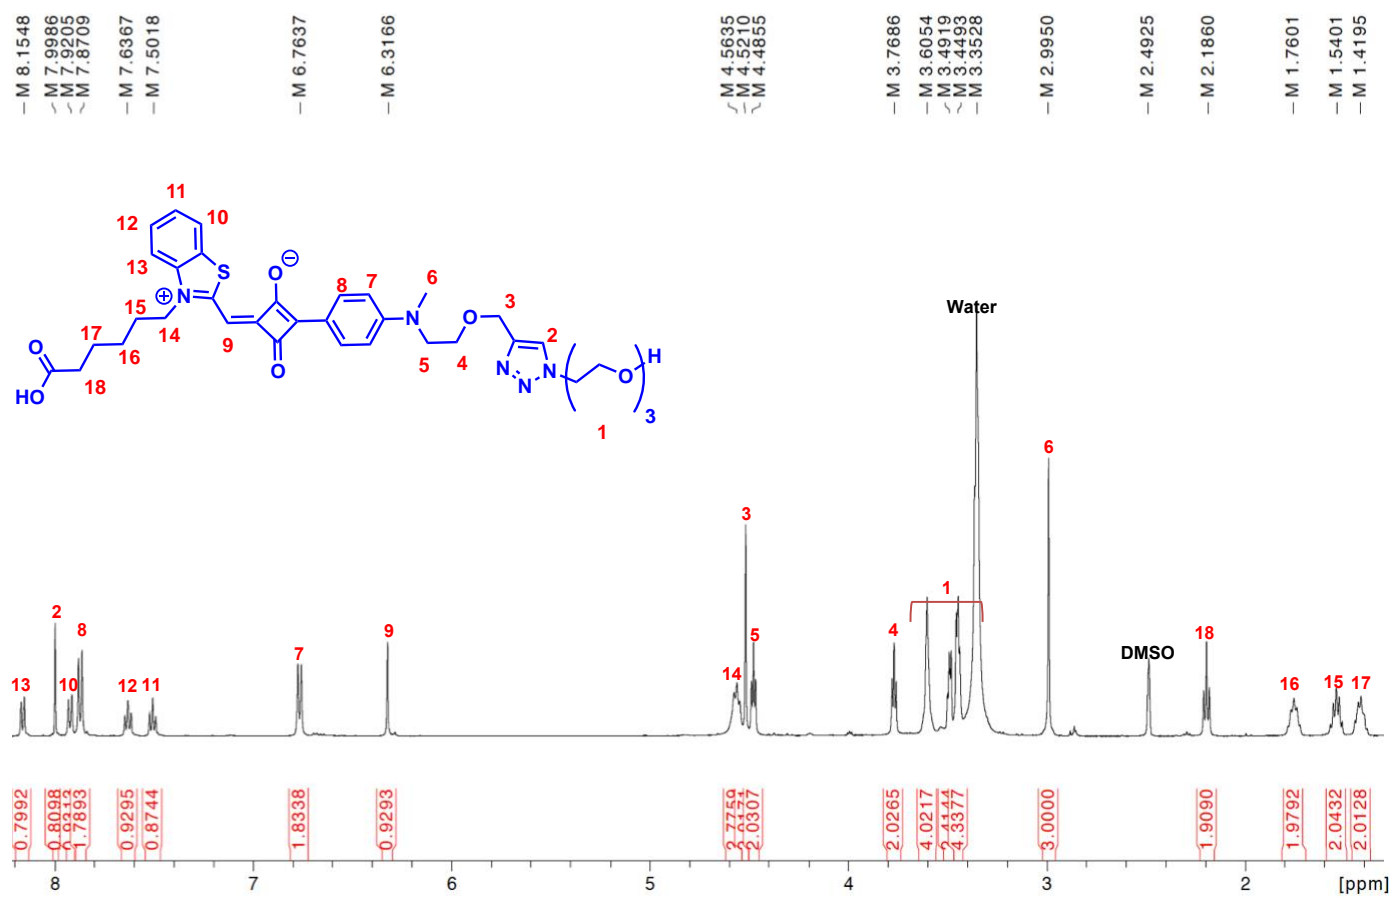

$^1\text{H}$  NMR spectrum (500 MHz, DMSO- $d_6$ ) of **USQ**.



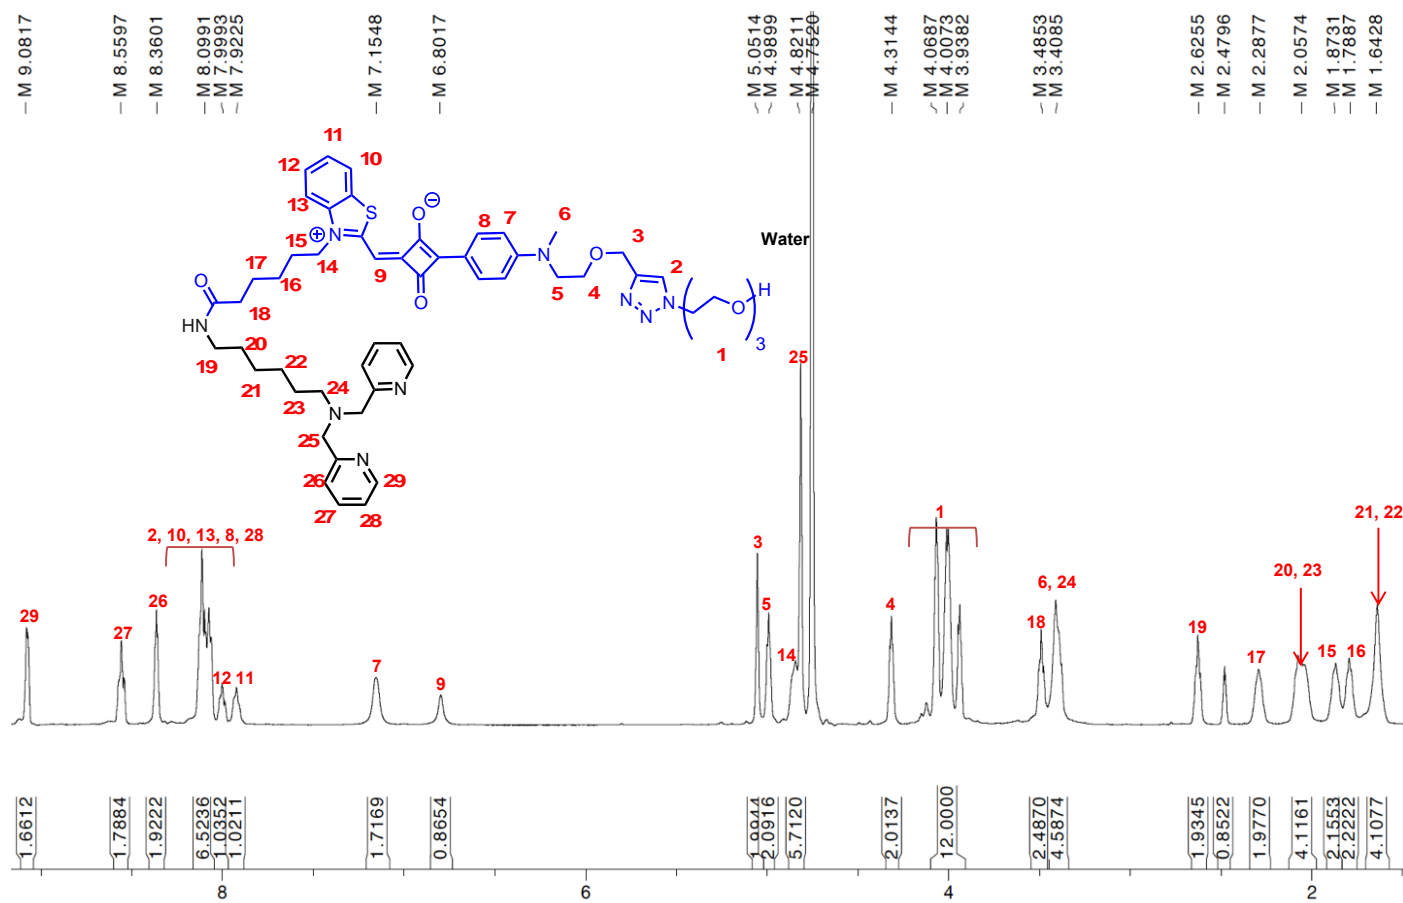

<sup>1</sup>H NMR spectrum (500 MHz, 1:1 – CD<sub>3</sub>CN:D<sub>2</sub>O) of **DPA-USQ**.

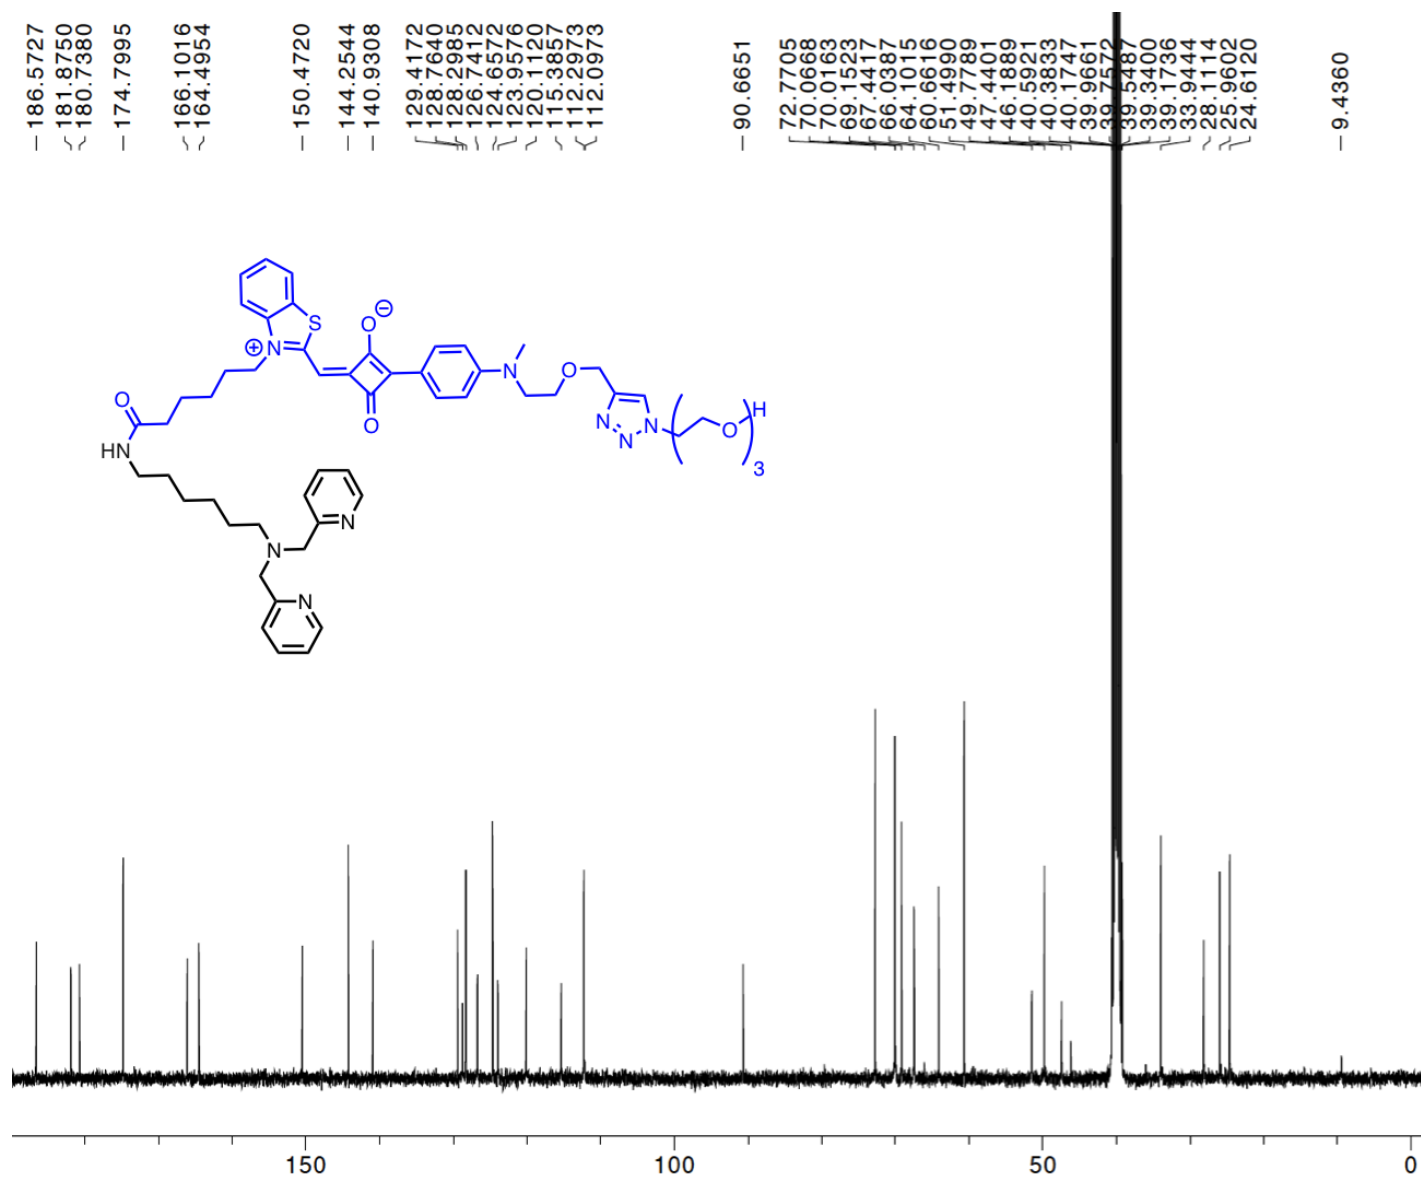

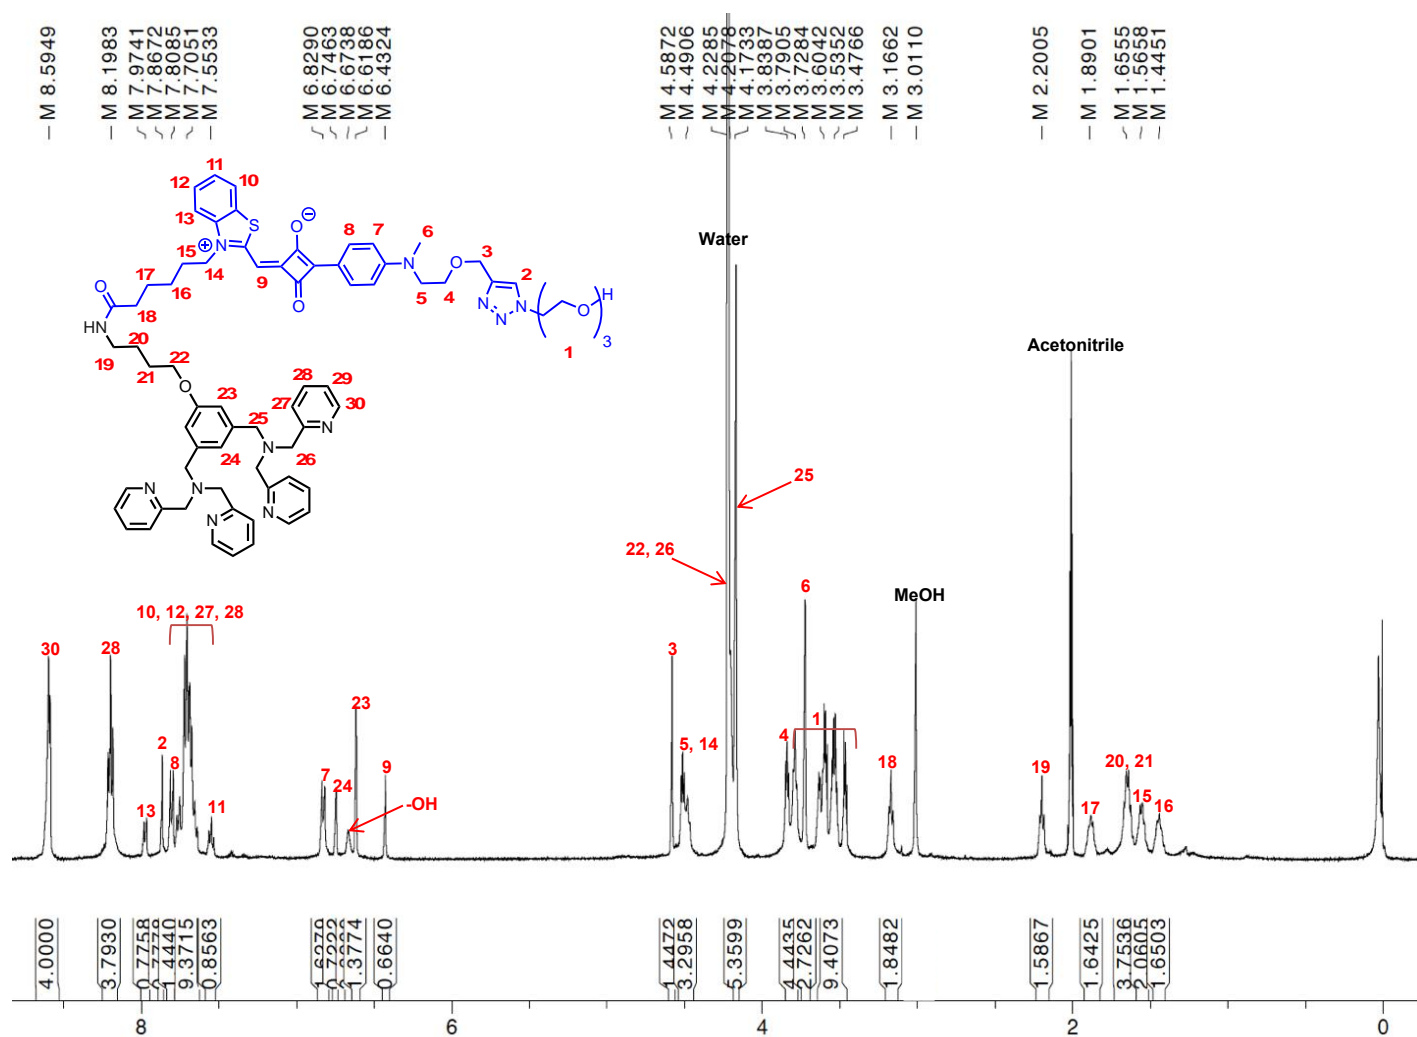

<sup>1</sup>H NMR spectrum (500 MHz, 1:1 – CD<sub>3</sub>CN:D<sub>2</sub>O) of **BDPA-USQ**.

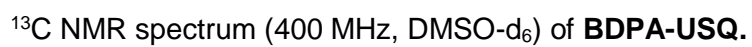

**Acquisition Parameter**

|             |            |                      |          |                  |           |
|-------------|------------|----------------------|----------|------------------|-----------|
| Source Type | ESI        | Ion Polarity         | Positive | Set Nebulizer    | 0.4 Bar   |
| Focus       | Not active | Set Capillary        | 4500 V   | Set Dry Heater   | 180 °C    |
| Scan Begin  | 50 m/z     | Set End Plate Offset | -500 V   | Set Dry Gas      | 4.0 l/min |
| Scan End    | 1650 m/z   | n/a                  | n/a      | Set Divert Valve | Source    |

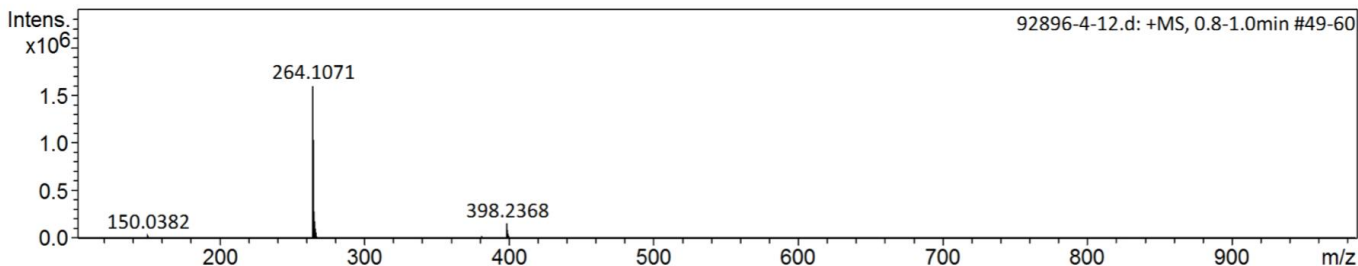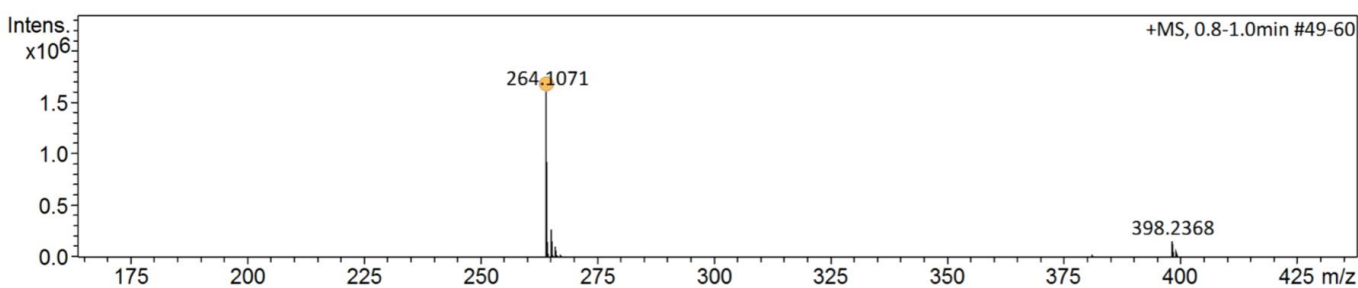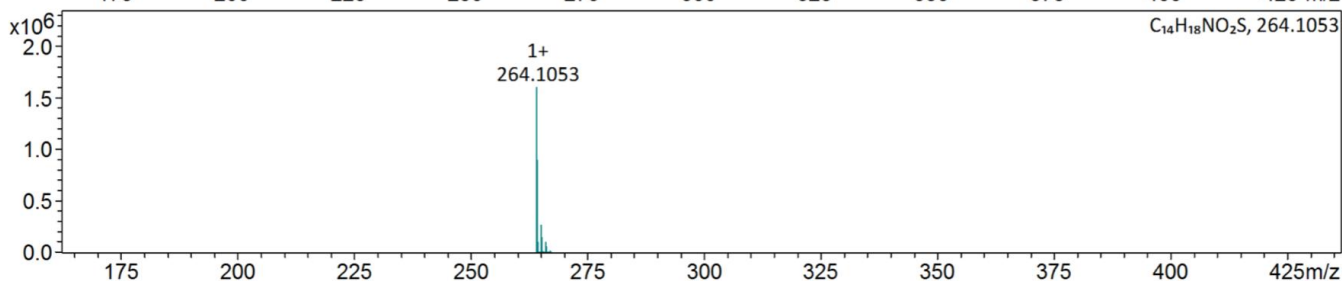

| Meas. m/z  | # | Ion Formula                                       | m/z        | err [ppm] | Mean err [ppm] | rdb | N-Rule | e <sup>-</sup> | Conf |
|------------|---|---------------------------------------------------|------------|-----------|----------------|-----|--------|----------------|------|
| 264.107123 | 1 | C <sub>14</sub> H <sub>18</sub> NO <sub>2</sub> S | 264.105276 | -7.0      | -6.8           | 6.5 | ok     | even           |      |

HR-MS spectrum of **4**

# Acquisition Parameter

|             |            |                       |           |                  |           |
|-------------|------------|-----------------------|-----------|------------------|-----------|
| Source Type | ESI        | Ion Polarity          | Positive  | Set Nebulizer    | 4.0 Bar   |
| Focus       | Not active | Set Capillary         | 4000 V    | Set Dry Heater   | 180 °C    |
| Scan Begin  | 100 m/z    | Set End Plate Offset  | -500 V    | Set Dry Gas      | 8.0 l/min |
| Scan End    | 3000 m/z   | Set Collision Cell RF | 170.0 Vpp | Set Divert Valve | Source    |

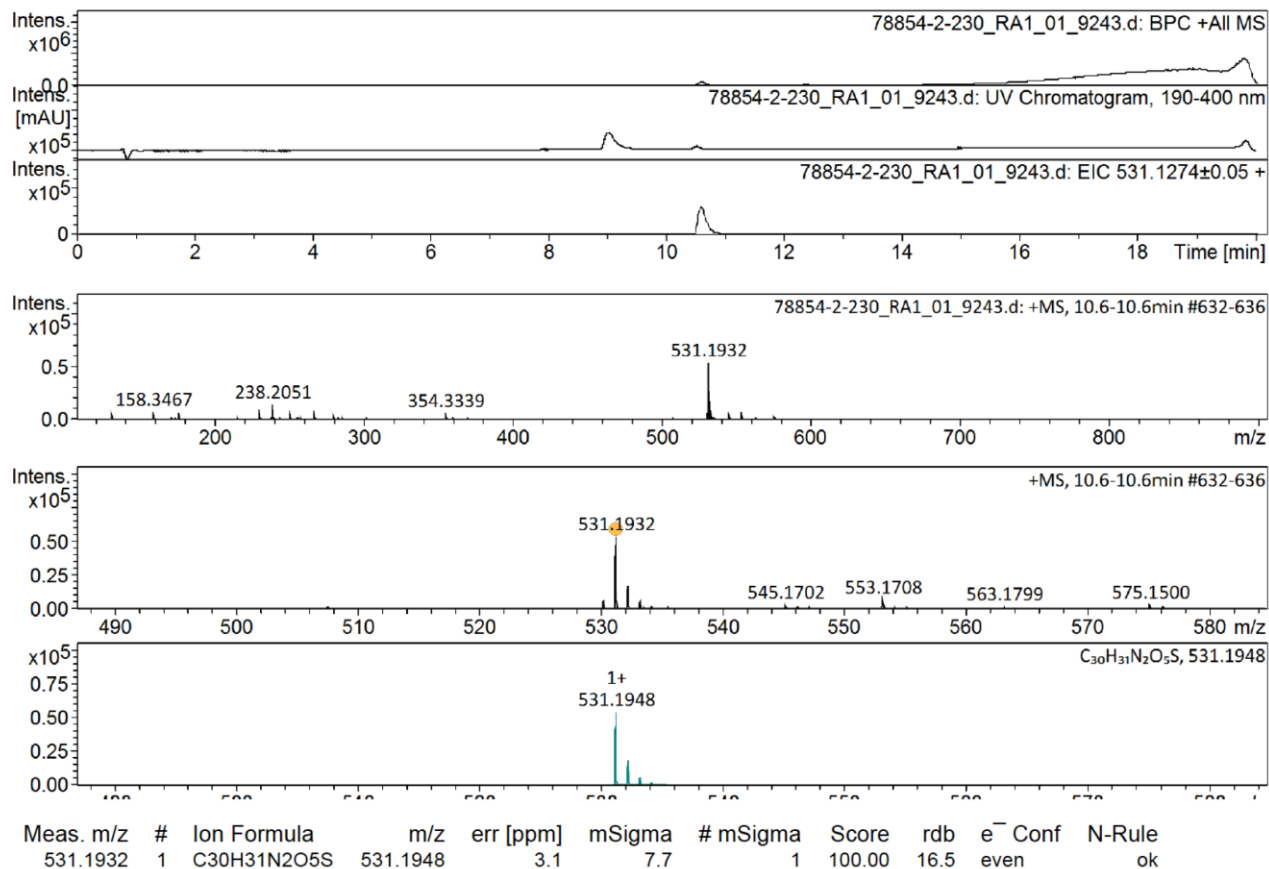

HR-MS spectrum of 5

**Acquisition Parameter**

|             |            |                      |          |                  |           |
|-------------|------------|----------------------|----------|------------------|-----------|
| Source Type | ESI        | Ion Polarity         | Positive | Set Nebulizer    | 0.4 Bar   |
| Focus       | Not active | Set Capillary        | 4500 V   | Set Dry Heater   | 180 °C    |
| Scan Begin  | 50 m/z     | Set End Plate Offset | -500 V   | Set Dry Gas      | 4.0 l/min |
| Scan End    | 1650 m/z   | n/a                  | n/a      | Set Divert Valve | Source    |

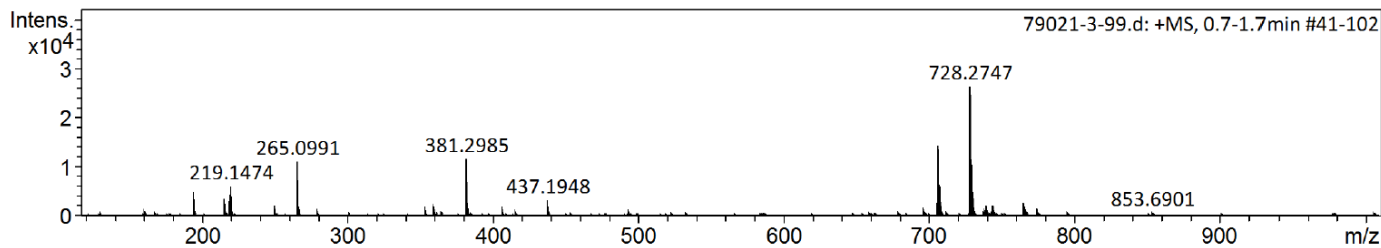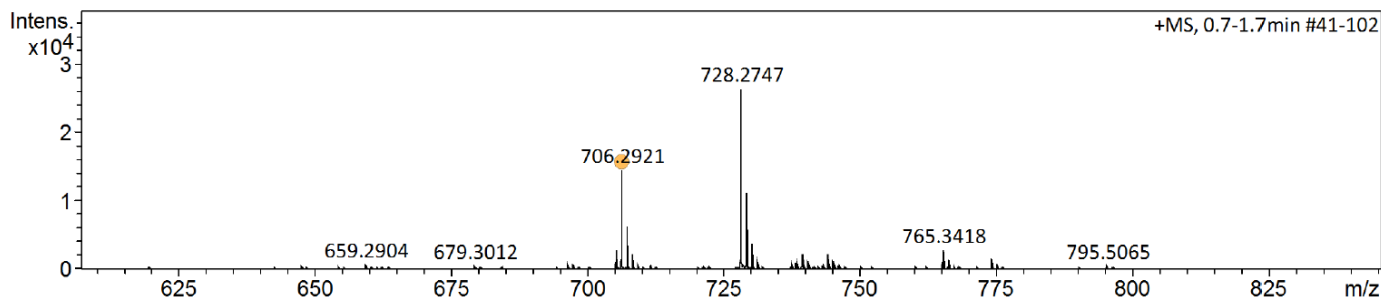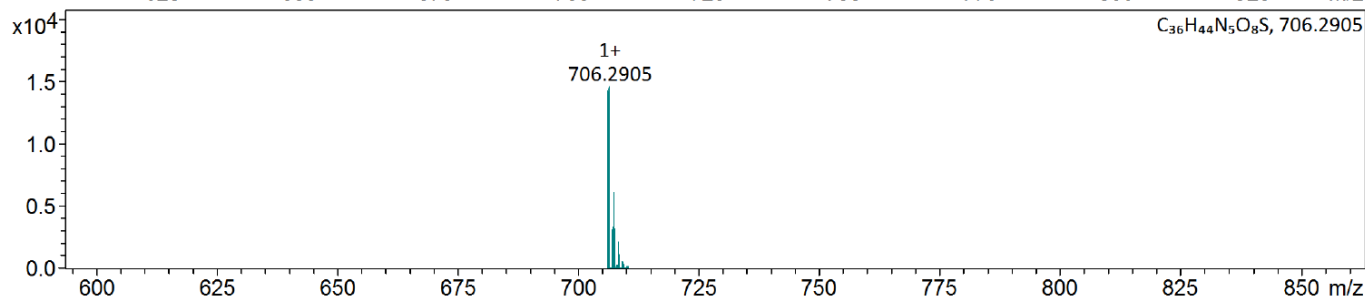

| Meas. m/z  | # | Ion Formula                                                     | m/z        | err [ppm] | Mean err [ppm] | rdb  | N-Rule | e <sup>-</sup> Conf |
|------------|---|-----------------------------------------------------------------|------------|-----------|----------------|------|--------|---------------------|
| 706.292074 | 1 | C <sub>36</sub> H <sub>44</sub> N <sub>5</sub> O <sub>8</sub> S | 706.290511 | -2.2      | -2.3           | 17.5 | ok     | even                |

HR-MS spectrum of **USQ**

# Acquisition Parameter

|             |            |                      |          |                  |           |
|-------------|------------|----------------------|----------|------------------|-----------|
| Source Type | ESI        | Ion Polarity         | Positive | Set Nebulizer    | 0.4 Bar   |
| Focus       | Not active | Set Capillary        | 4500 V   | Set Dry Heater   | 180 °C    |
| Scan Begin  | 50 m/z     | Set End Plate Offset | -500 V   | Set Dry Gas      | 4.0 l/min |
| Scan End    | 1650 m/z   | n/a                  | n/a      | Set Divert Valve | Waste     |

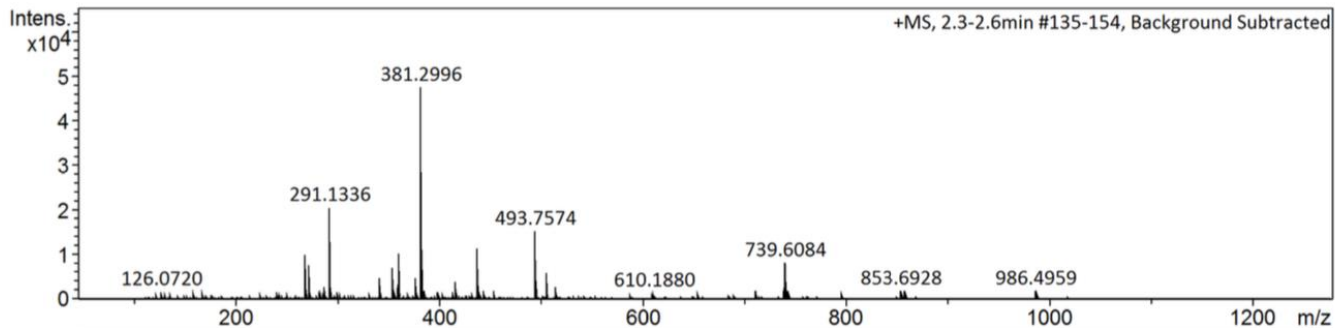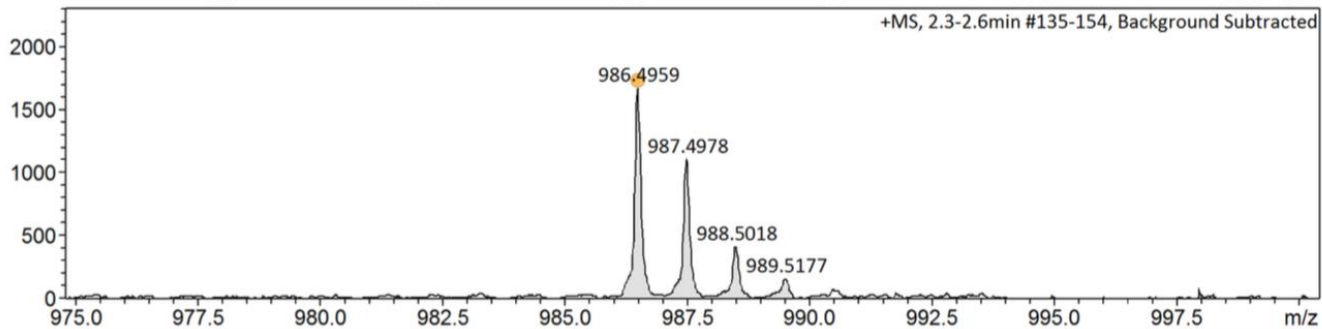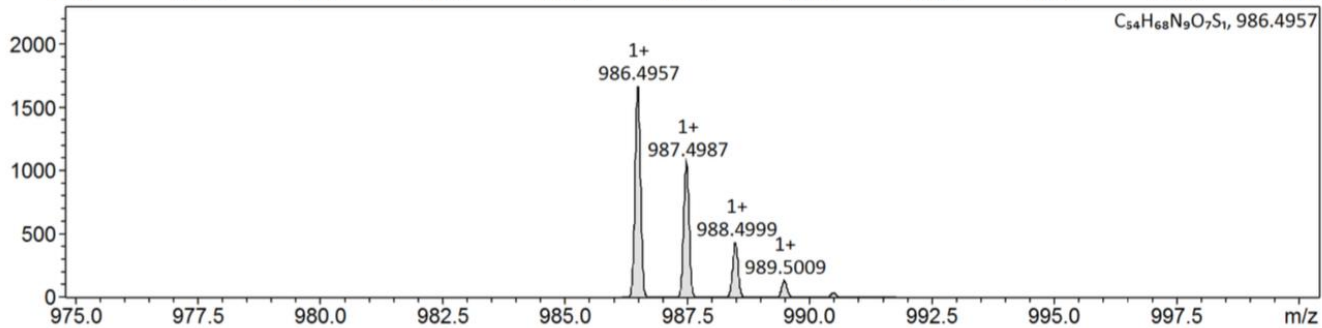

| Meas. m/z  | # | Ion Formula                                                                  | m/z        | err [ppm] | Mean err [ppm] | rdb  | N-Rule | e <sup>-</sup> Conf |
|------------|---|------------------------------------------------------------------------------|------------|-----------|----------------|------|--------|---------------------|
| 986.495907 | 1 | C <sub>54</sub> H <sub>68</sub> N <sub>9</sub> O <sub>7</sub> S              | 986.495693 | -0.2      | 927.1          | 25.5 | ok     | even                |
|            | 2 | C <sub>59</sub> H <sub>68</sub> N <sub>7</sub> O <sub>5</sub> S              | 986.499716 | 3.9       | 919.9          | 29.5 | ok     | even                |
|            | 3 | C <sub>51</sub> H <sub>72</sub> N <sub>9</sub> O <sub>7</sub> S <sub>2</sub> | 986.499064 | 3.2       | 939.7          | 20.5 | ok     | even                |

HR-MS spectrum of **DPA-USQ**

# Acquisition Parameter

|             |            |                       |           |                  |           |
|-------------|------------|-----------------------|-----------|------------------|-----------|
| Source Type | ESI        | Ion Polarity          | Positive  | Set Nebulizer    | 4.0 Bar   |
| Focus       | Not active | Set Capillary         | 4500 V    | Set Dry Heater   | 180 °C    |
| Scan Begin  | 500 m/z    | Set End Plate Offset  | -500 V    | Set Dry Gas      | 8.0 l/min |
| Scan End    | 3000 m/z   | Set Collision Cell RF | 800.0 Vpp | Set Divert Valve | Source    |

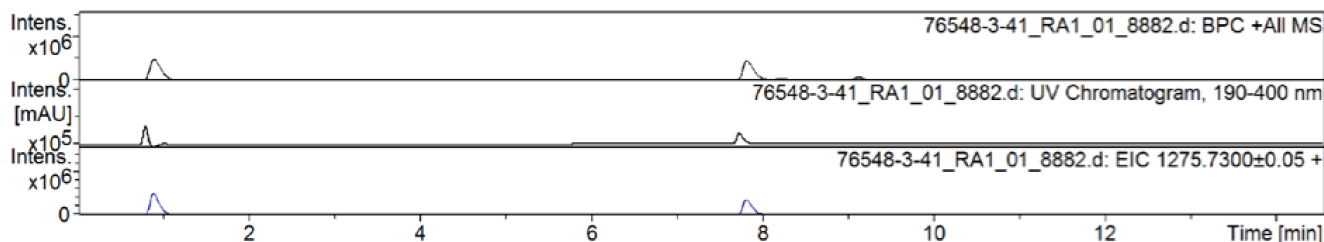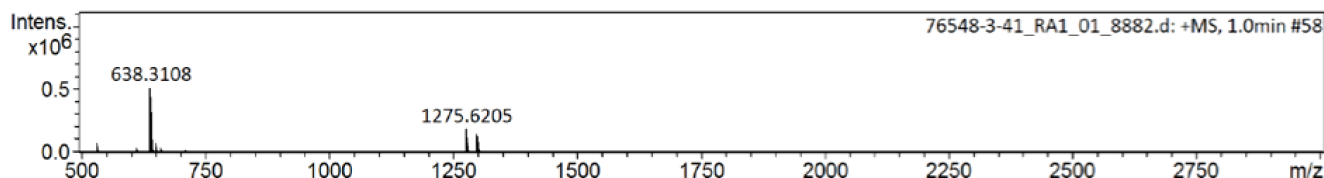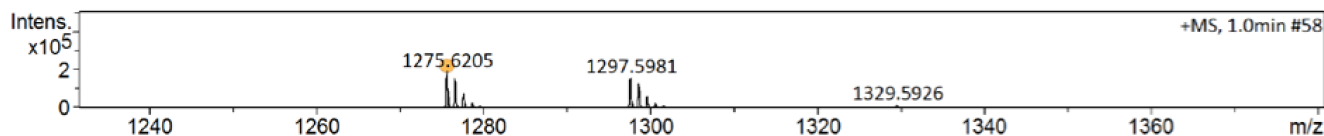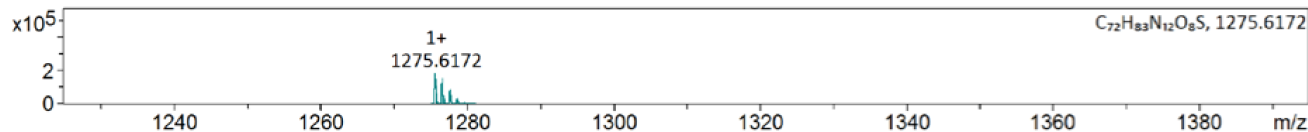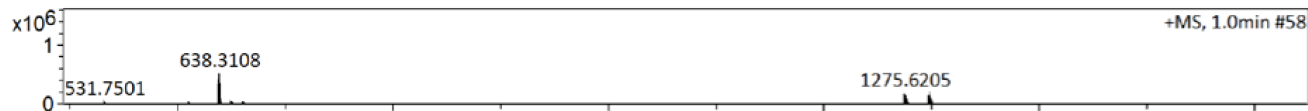

| Meas. m/z | # | Ion Formula                                                      | m/z       | err [ppm] | mSigma | # mSigma | Score  | rdB  | e <sup>-</sup> Conf | N-Rule |
|-----------|---|------------------------------------------------------------------|-----------|-----------|--------|----------|--------|------|---------------------|--------|
| 1275.6205 | 1 | C <sub>72</sub> H <sub>83</sub> N <sub>12</sub> O <sub>8</sub> S | 1275.6172 | -2.6      | 4.1    | 1        | 100.00 | 37.5 | even                | ok     |

HR-MS spectrum of **BDPA-USQ**

## B. Photophysical Studies

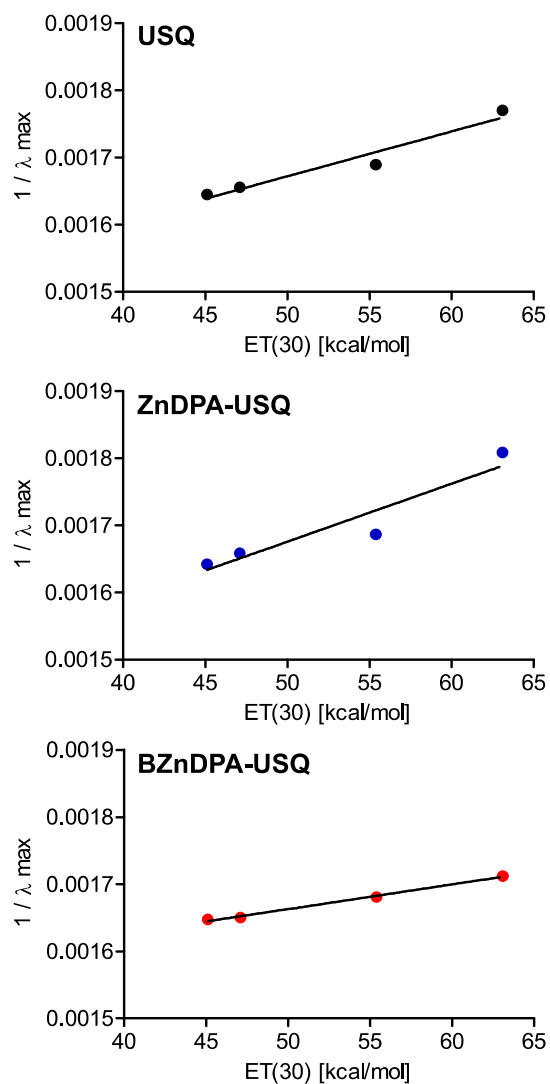

**Figure S1.** Linear correlation between  $E_T(30)$  values and  $1/\lambda_{\max}$  for absorption in solvents of different polarity dimethylsulfoxide (DMSO), butanol (BuOH), methanol (MeOH), and water ( $H_2O$ ).

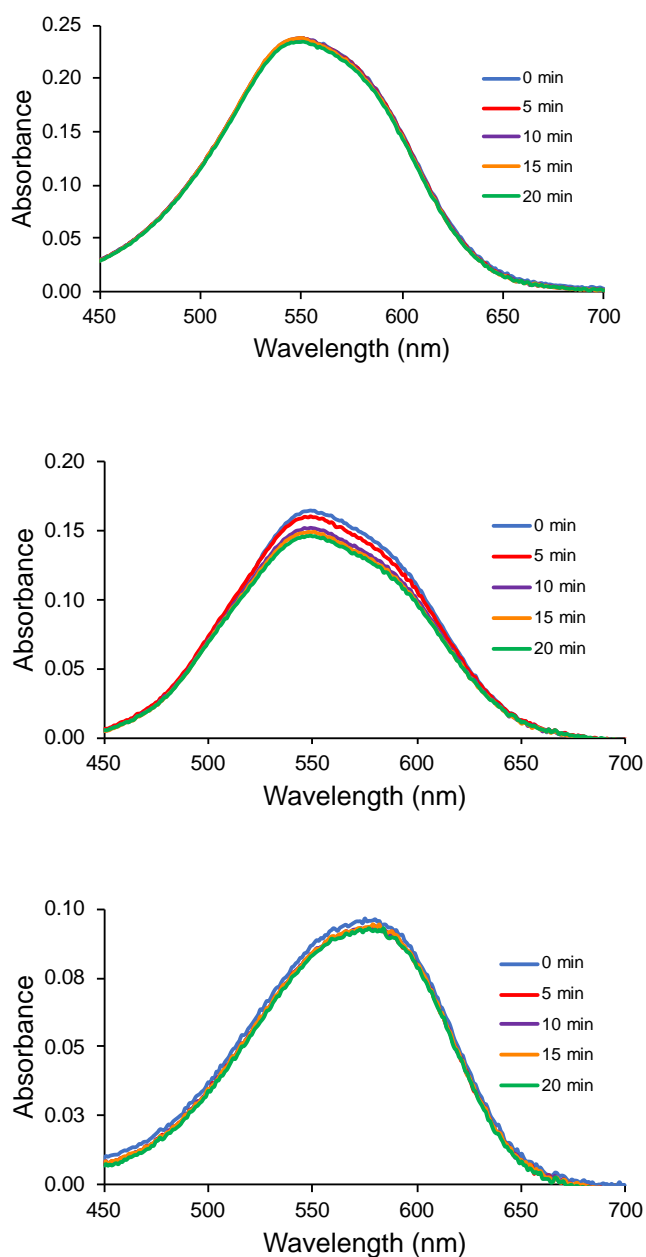

**Figure S2.** Photostability of: (*top*) **USQ**, (*middle*) **ZnDPA-USQ**, and (*bottom*) **ZnDPA-USQ**. In each case, a cuvette containing an aqueous solution (6  $\mu$ M) at 20  $^{\circ}$ C was irradiated with intense light from a Xenon lamp, passed through a 495 nm longpass filter, for 20 minutes. There was little or no change in sample absorbance over time indicating high photostability.

### C. In Vitro Studies

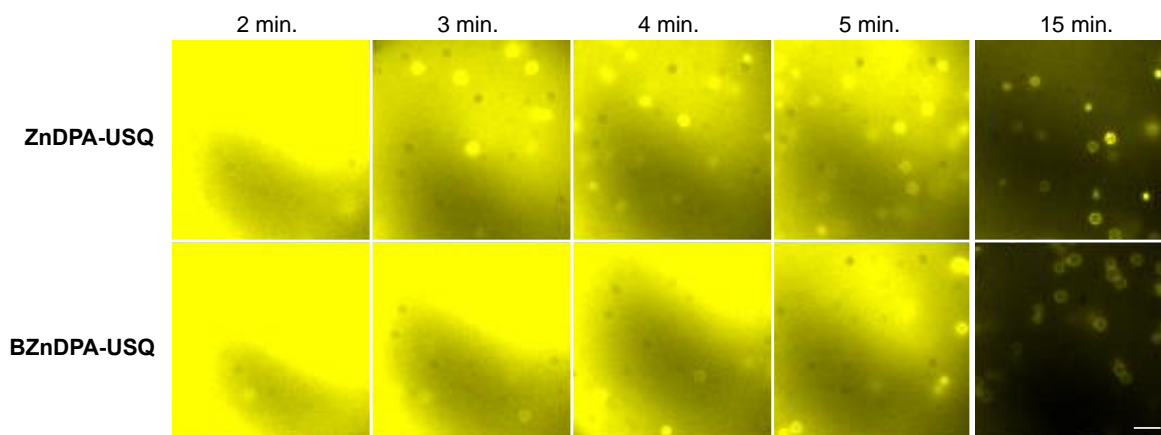

**Figure S3.** Fluorescent micrographs of RBC ghosts treated with 10  $\mu$ M **ZnDPA-USQ** or **BZnDPA-USQ** and imaged at subsequent time points using a standard TxRed filter set. Scale bar = 25  $\mu$ M

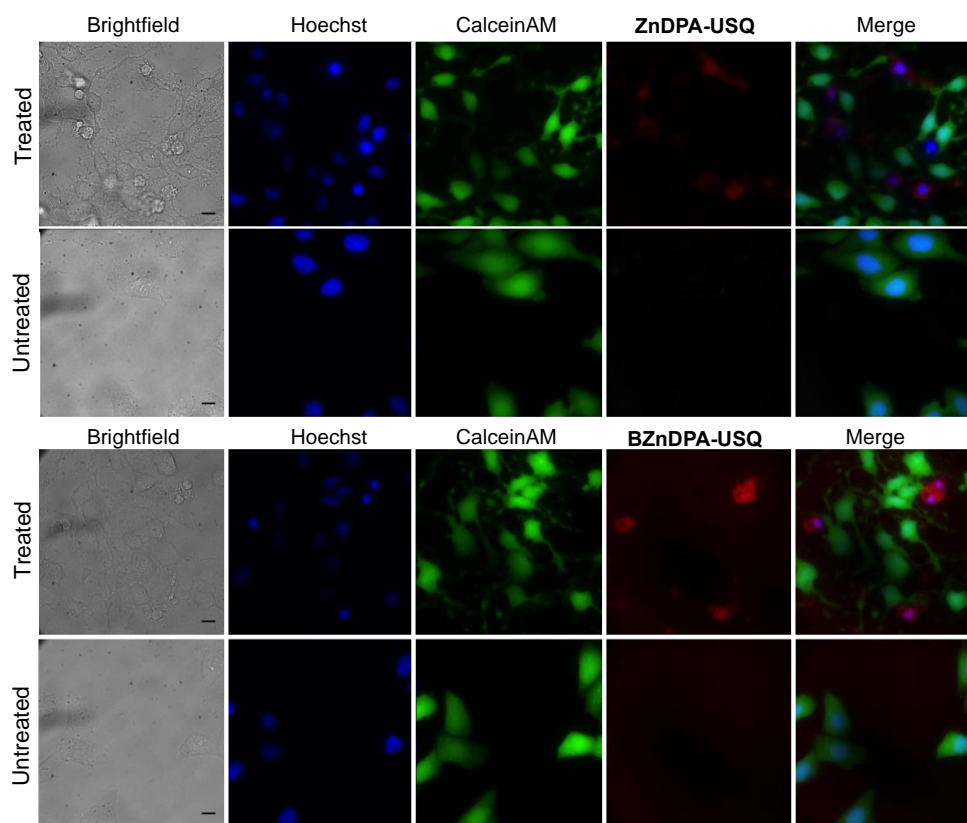

**Figure S4.** Fluorescence micrographs of CHO-K1 cells that had been treated with Staurosporine (500 nM) for 3 hours or were untreated. The cells were subsequently treated with **ZnDPA-USQ** or **BZnDPA-USQ** (red, 500 nM), nuclear stain Hoechst33342 (blue, 3  $\mu$ M) and live cell indicator CalceinAM (green, 5  $\mu$ M). Scale bar = 50  $\mu$ M

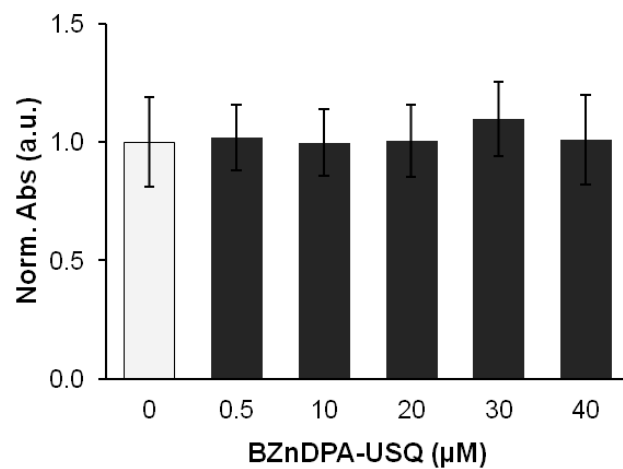

**Figure S5.** MTT assay measuring vitality of CHO-K1 cells after incubation with **BZnDPA-USQ** for 24 hours.

## D. *Xenopus* Studies

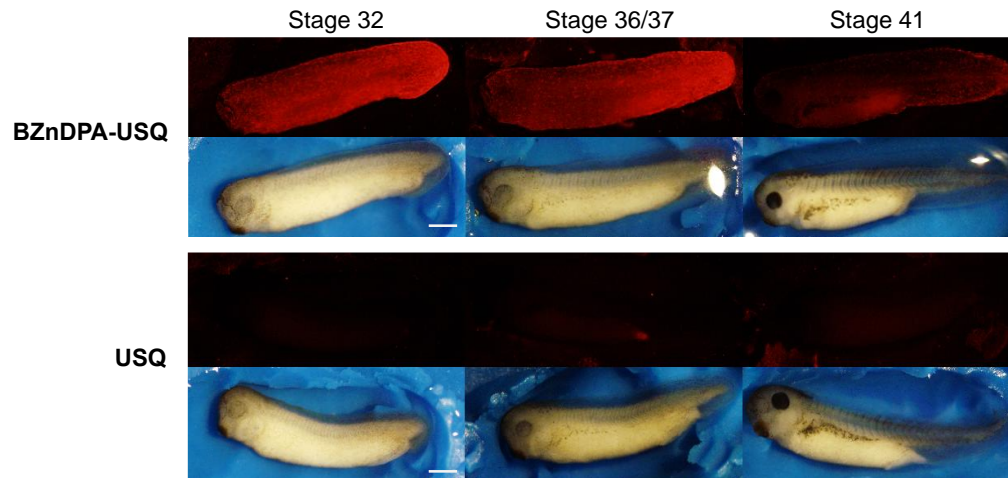

**Figure S6.** Fluorescent images of *Xenopus* embryos treated with **BZnDPA-USQ** (top) or **USQ** (bottom) (30  $\mu$ M) for 16 hours (stage 32). At that point, the incubation medium was change to probe-free 1/3 MMR, and incubation continued, with imaging occurring at additional time periods of 8 hours (stage 36/37) and 30 hours (stage 41). Scale bar = 0.5 mm

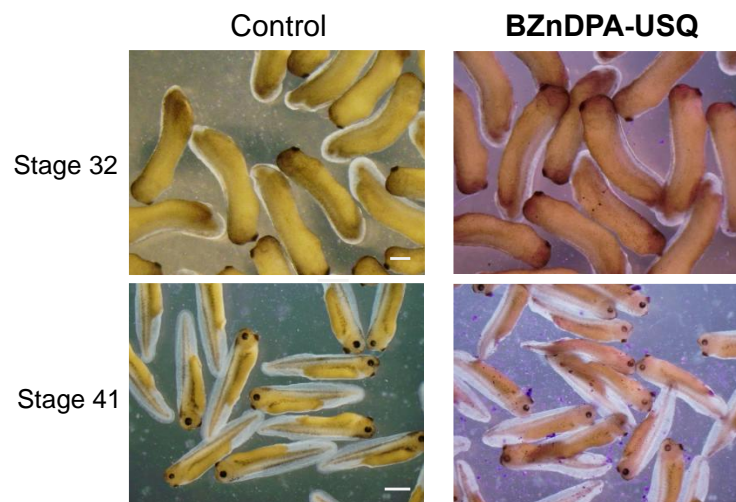

**Figure S7.** Brightfield images showing *Xenopus* embryos after incubation in probe-free 1/3 MMR solution (Control) or **BZnDPA-USQ** (30  $\mu$ M) for 16 hours (stage 32) or 46 hours (stage 41). Scale bar = 1 mm

## References

- (S1) Collins, C. G.; Lee, J. M.; Oliver, A. G.; Wiest, O. Smith, B. D. Internal and External Stereoisomers of Squaraine Rotaxane Endoperoxide: Synthesis, Chemical Difference, and Structural Revision. *J. Org. Chem.* **2014**, *79*, 1120-1130.
- (S2) Lakshmi, C.; Hanshaw, R. G.; Smith, B. D. Fluorophore-linked Zinc(II)dipicolylamine Coordination Complexes as Sensors for Phosphatidylserine-containing Membranes. *Tetrahedron* **2004**, *60*, 11307–11315.
